# Supplementary material
Source: publisher figshare collection journal article supplement (https://tandf.figshare.com/articles/dataset/_/6840365)
Supplement: Supplementary file 1 [file 1]

**Supplementary Table 1.** Immunohistochemical characteristics of endothelium cell- Descemet's membrane (EDM) complexes of patients with Fuchs' endothelial dystrophy (FED) and bullous keratopathy (BK).

| Keratopathy | Gender, Age, Eye  | Cytokeratin | Fibronectin |
|-------------|-------------------|-------------|-------------|
| <b>FED</b>  | Male, 77, Left    | -           | + ABL/EN    |
|             | Female, 54, Right | + ABL       | -           |
|             | Female, 64, Right | + EN        | + EN        |
|             | Male, 70, Left    | + EN        | -           |
|             | Female, 50, Left  | -           | + EN        |
|             | Female, 83, Left  | -           | -           |
| <b>BK</b>   | Male, 68, Right   | + ABL       | + ABL/EN    |
|             | Female, 75, Right | + EN        | + EN        |
|             | Female, 82, Right | -           | + EN        |
|             | Male, 47, Left    | + ABL/EN    | + ABL/EN    |
|             | Male, 85, Right   | + ABL/EN    | + EN        |
|             | Male, 75, Right   | + ABL/EN    | + ABL/EN    |
|             | Male, 70, Right   | + EN        | -           |
|             | Male, 73, Right   | + EN        | + EN        |

Stained section was localized on the anterior banded layer (ABL) and/or the endothelium (EN). – = no staining, + = moderate or strong staining.
